# Supplementary material for: Evolution of Extensively Drug-Resistant Tuberculosis over Four Decades: Whole Genome Sequencing and Dating Analysis of Mycobacterium tuberculosis Isolates from KwaZulu-Natal
Source: PubMed Central journal article supplement (PMC4587932; doi:10.1371/journal.pmed.1001880), 2015-09-29
Supplement: pmed.1001880.s007.pdf [file pmed.1001880.s007.pdf]

| <b>Clone Name</b>  | <b>Spoligotype</b> | <b># of Isolates</b> | <b>Phenotypic DST</b> | <b>Figure S2 Identifier</b> |
|--------------------|--------------------|----------------------|-----------------------|-----------------------------|
| Tugela Ferry Clone | LAM4               | 50                   | XDR                   | 10-AAI                      |
| LAM4-2             | LAM4               | 4                    | MDR/XDR               | 10-ABK                      |
| LAM4-3             | LAM4               | 5                    | MDR                   | 10-ADI                      |
| LAM4-4             | LAM4               | 11                   | mono/poly/MDR         | 10-ABQ                      |
| S-1                | S                  | 13                   | MDR/XDR               | 10-ABR                      |
| S-2                | S                  | 5                    | MDR                   | 10-ABZ                      |
| S-3                | S                  | 3                    | MDR                   | 10-ABJ                      |
| Beijing            | Beijing            | 5                    | MDR/XDR               | 10-AAG                      |
| X3                 | X3                 | 5                    | MDR/XDR               | 10-ABN                      |
| T3                 | T3                 | 3                    | MDR                   | 10-AFO                      |
| EAI1-SOM           | EAI1-SOM           | 3                    | poly/MDR              | 10-AGR                      |
