# Supplementary material for: Evolution of Extensively Drug-Resistant Tuberculosis over Four Decades: Whole Genome Sequencing and Dating Analysis of Mycobacterium tuberculosis Isolates from KwaZulu-Natal
Source: PubMed Central journal article supplement (PMC4587932; doi:10.1371/journal.pmed.1001880), 2015-09-29
Supplement: pmed.1001880.s008.pdf [file pmed.1001880.s008.pdf]

| <b>DST pattern</b>       | <b># of Strains</b> | <b># of predicted spoligotypes</b> | <b># of independent evolutionary gains</b> |
|--------------------------|---------------------|------------------------------------|--------------------------------------------|
| Susceptible              | 89                  | 15                                 | n/a                                        |
| Mono drug-resistant      | 23                  | 8                                  | Not calculated                             |
| Poly drug-resistant      | 19                  | 9                                  | Not calculated                             |
| MDR <i>sensu stricto</i> | 141                 | 12                                 | 56                                         |
| XDR                      | 68                  | 7                                  | 9                                          |
