# Supplementary material for: Evolution of Extensively Drug-Resistant Tuberculosis over Four Decades: Whole Genome Sequencing and Dating Analysis of Mycobacterium tuberculosis Isolates from KwaZulu-Natal
Source: PLOS journal article supplement (doi:10.1371/journal.pmed.1001880), 2015-09-29
Supplement: S11 (10.1371/journal.pmed.1001880.s011) [file journal.pmed.1001880.s011]

|                            | <b># evolutions<br/>before<br/>genotypic<br/>resistance</b> | <b># evolutions after<br/>genotypic<br/>resistance</b> | <b># evolutions<br/>concurrent to<br/>genotypic<br/>resistance</b> | <b># evolutions<br/>concurrent or after<br/>genotypic resistance</b> |
|----------------------------|-------------------------------------------------------------|--------------------------------------------------------|--------------------------------------------------------------------|----------------------------------------------------------------------|
| <i>ahpC</i> promoter       | 0                                                           | 1                                                      | 0                                                                  | 1                                                                    |
| <i>ubiA</i> non-synonymous | 2                                                           | 6                                                      | 5                                                                  | 11                                                                   |
